# Supplementary material for: Longitudinal high-throughput TCR repertoire profiling reveals the dynamics of T-cell memory formation after mild COVID-19 infection
Source: eLife journal article supplement (doi:10.7554/elife.63502), 2021-01-05
Supplement: supp [file elife-63502-supp-v1.zip]

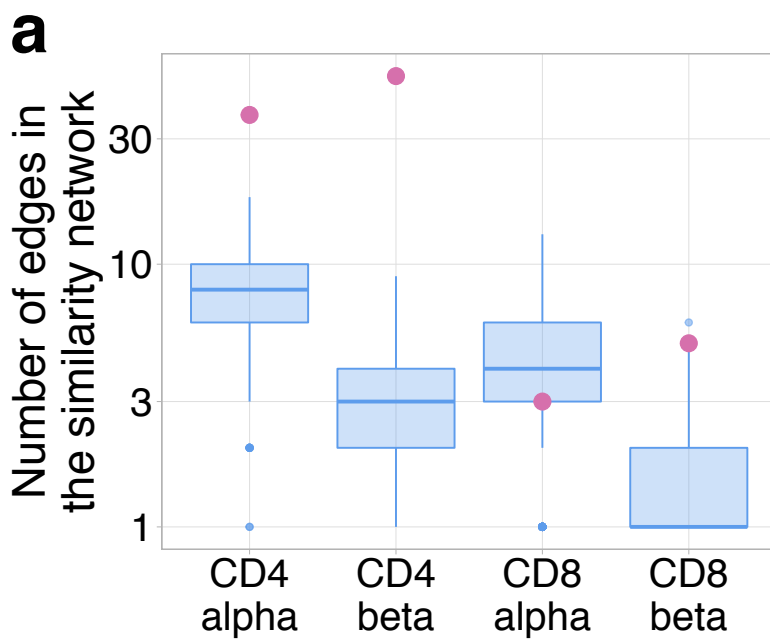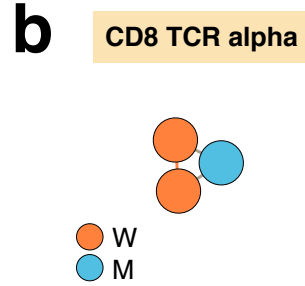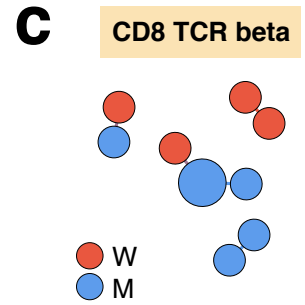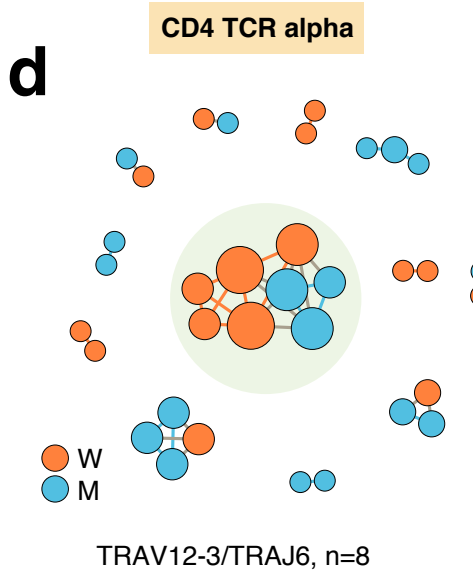

TRAV12-3/TRAJ6, n=8

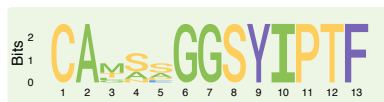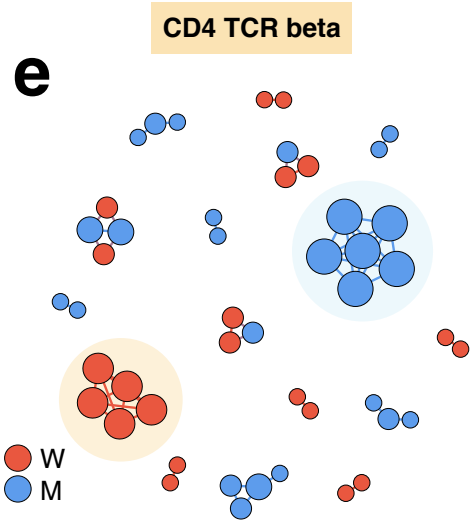

TRBV4-1/TRBJ2-3, n=6

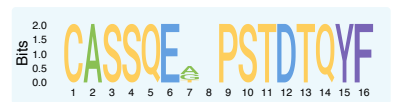

TRBV2/TRBJ2-1, n=5

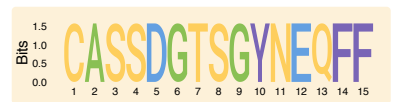

Aromatic Negatively charged Nonpolar, aliphatic Polar, uncharged Positively charged
