# Supplementary material for: Longitudinal high-throughput TCR repertoire profiling reveals the dynamics of T-cell memory formation after mild COVID-19 infection
Source: eLife journal article supplement (doi:10.7554/elife.63502), 2021-01-05

**a**

Fraction of reactive clones

donor W

donor M

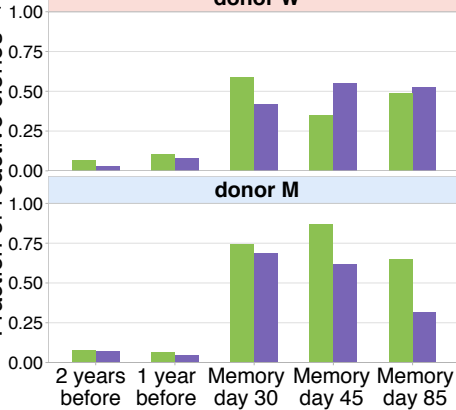**b**

Fraction of reactive clones

CD4

CD8

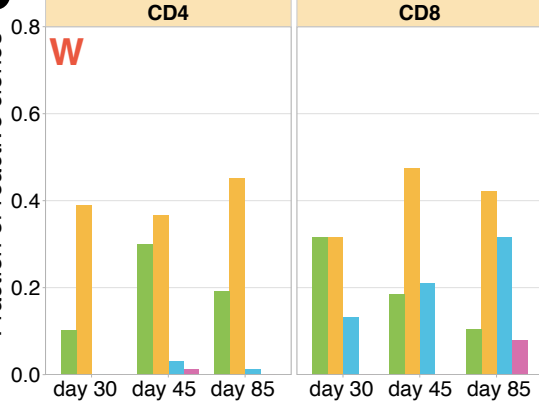**c**

Fraction of reactive clones

CD4

CD8

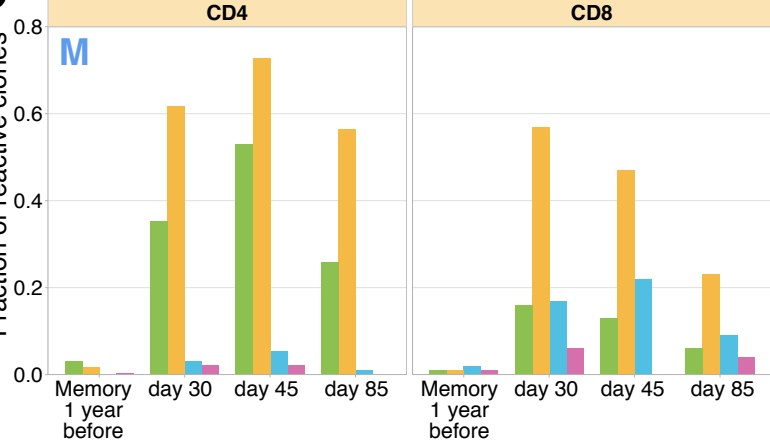

Supplement: supp [file elife-63502-supp-v1.zip]
