# Supplementary figures and images for: Longitudinal high-throughput TCR repertoire profiling reveals the dynamics of T-cell memory formation after mild COVID-19 infection
Source: eLife journal article supplement (doi:10.7554/elife.63502), 2021-01-05

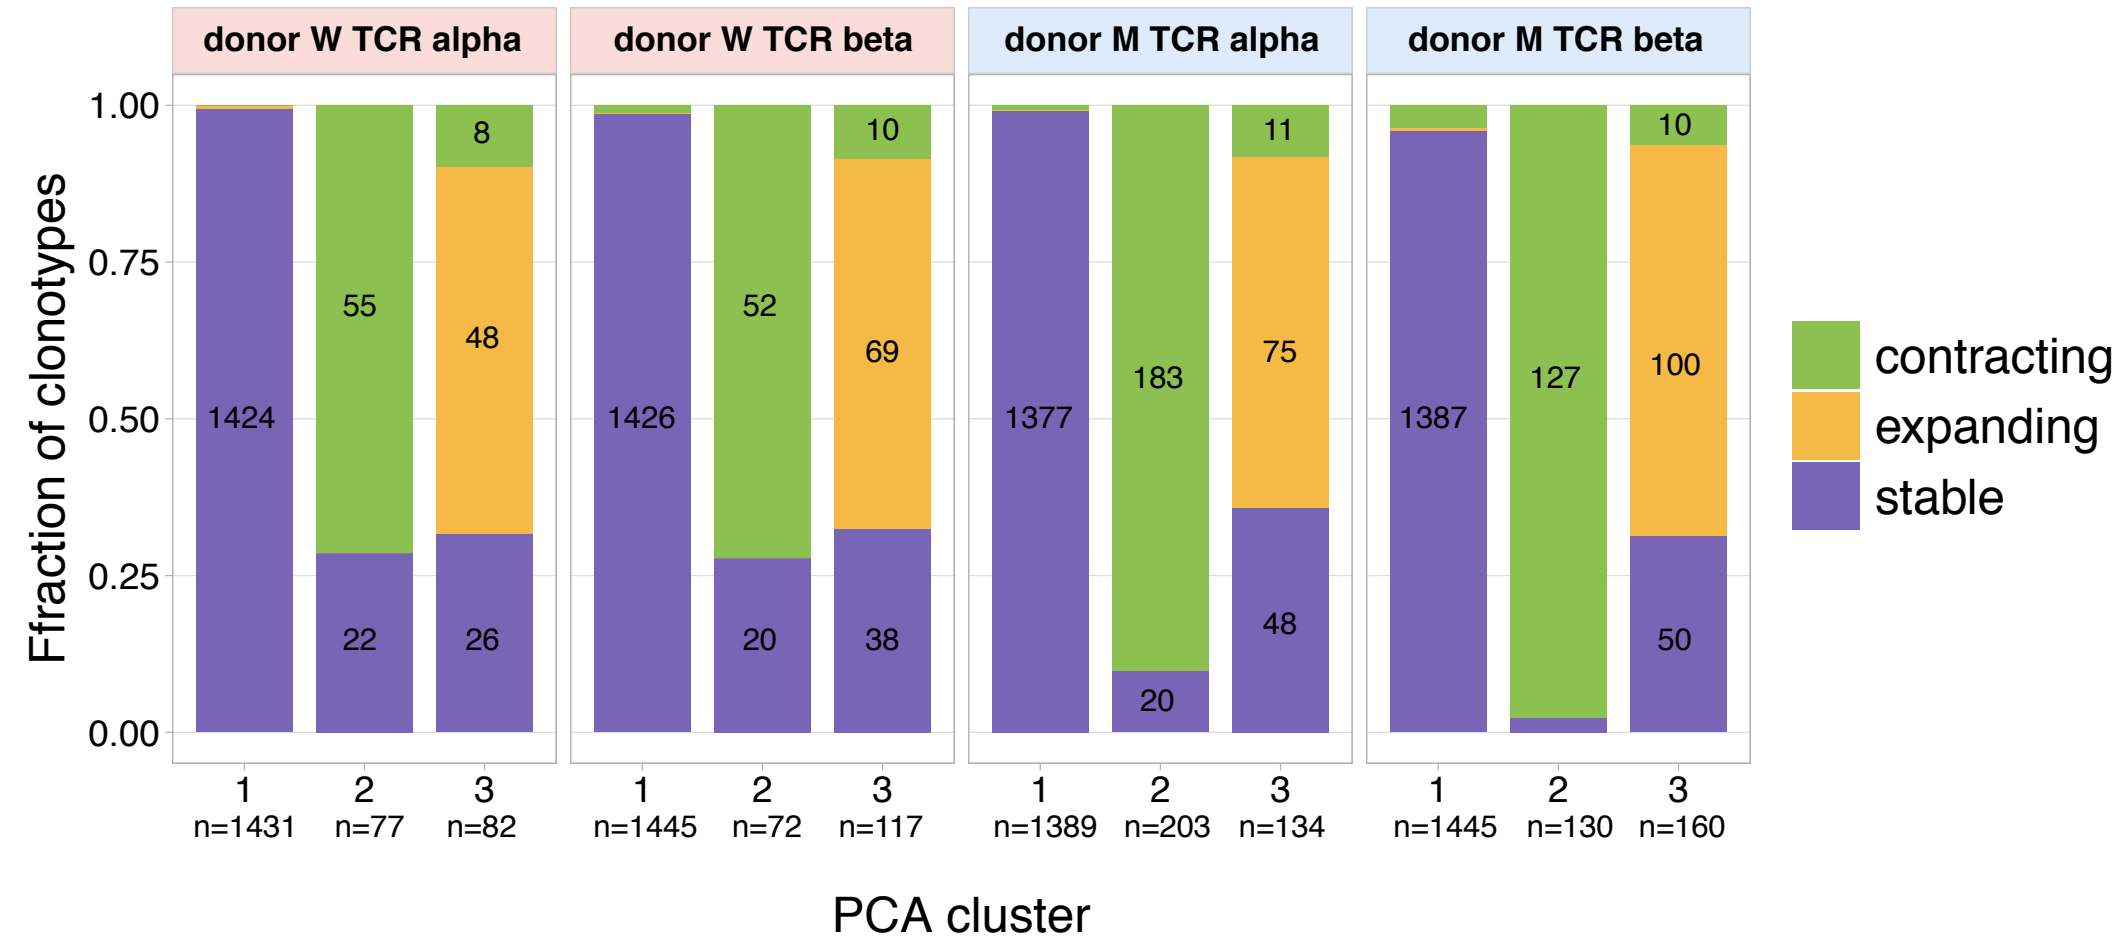

Supplement: supp [file elife-63502-supp-v1.zip]

**a**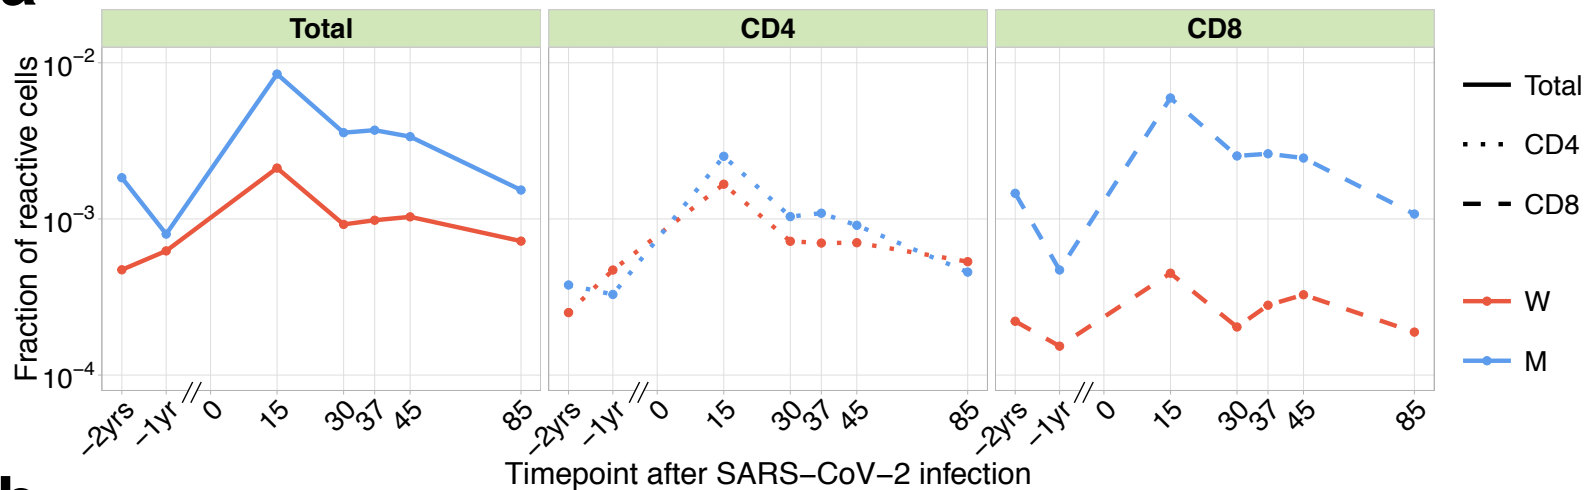**b**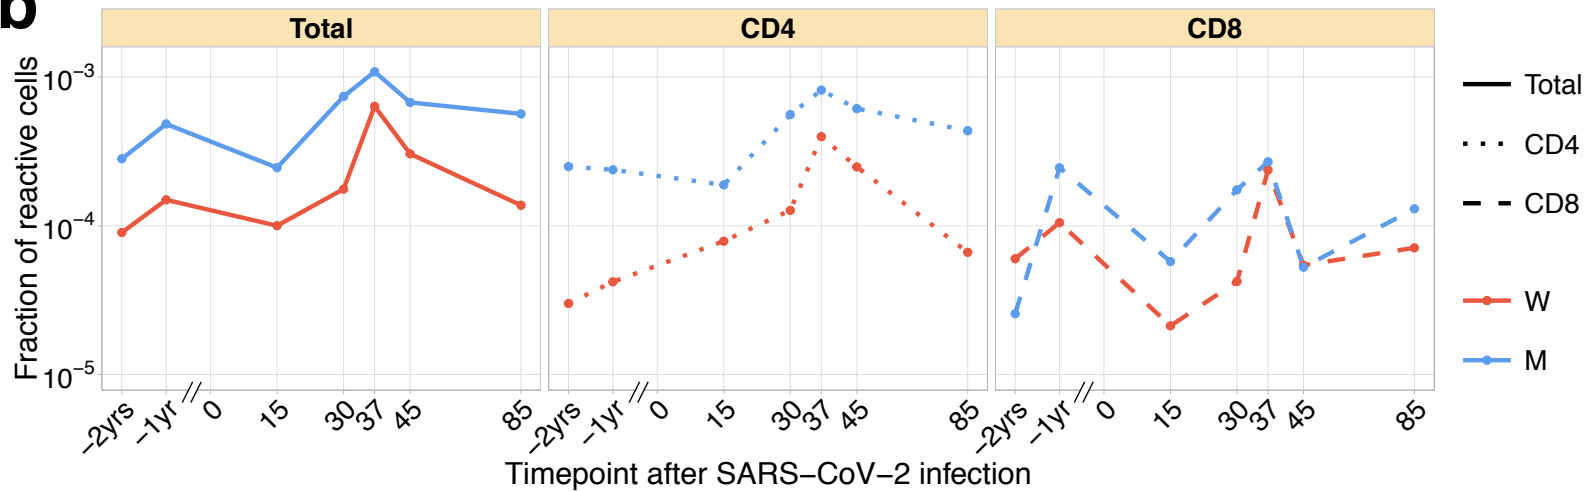

Supplement: supp [file elife-63502-supp-v1.zip]

**a**

donor M CD4 TCR motif  
(HLA-DRB1\*03:01)

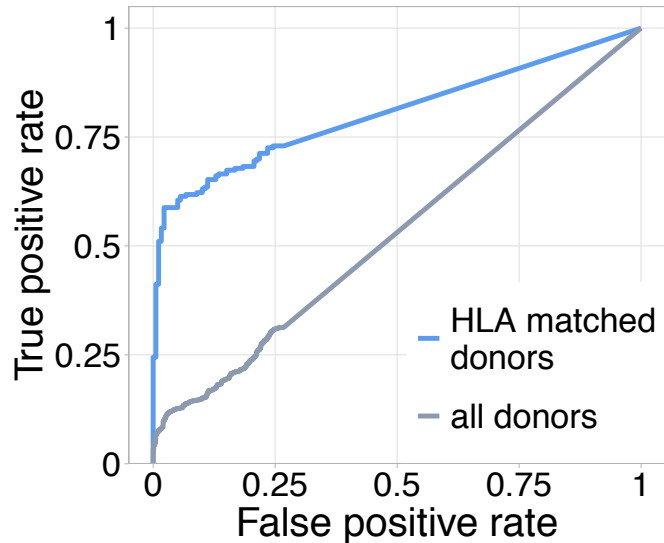**b**

donor W CD4 TCR motif  
(HLA-DRB1\*07:01)

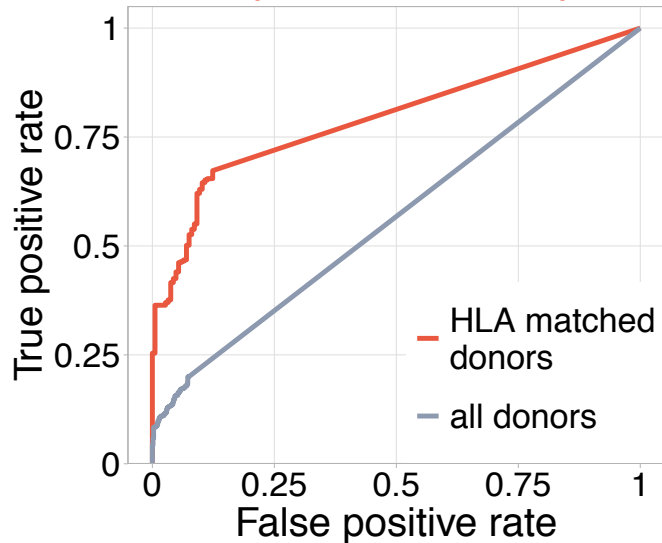

Supplement: supp [file elife-63502-supp-v1.zip]

**a**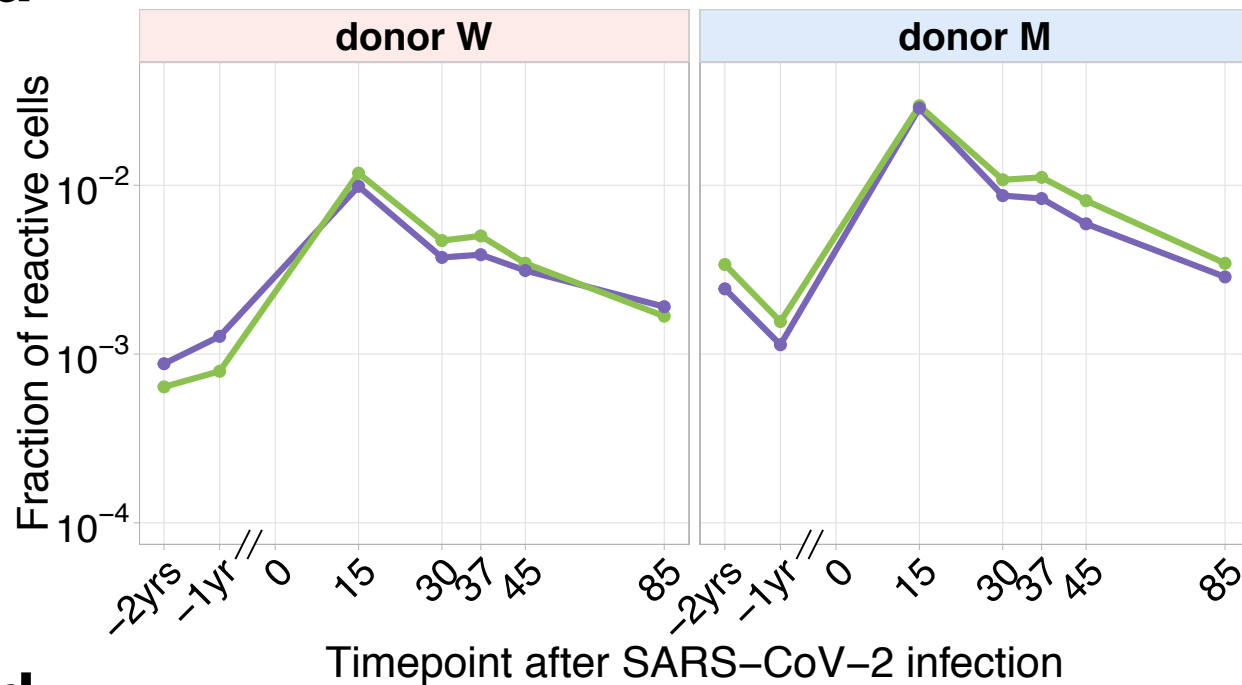**b**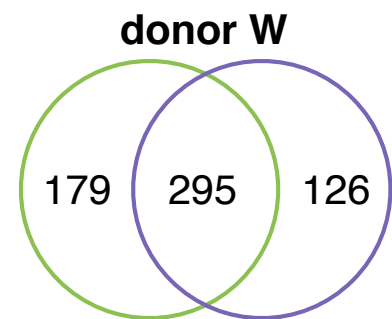**c**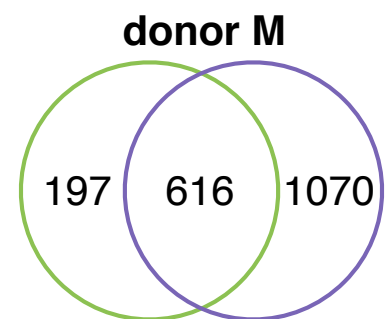**d**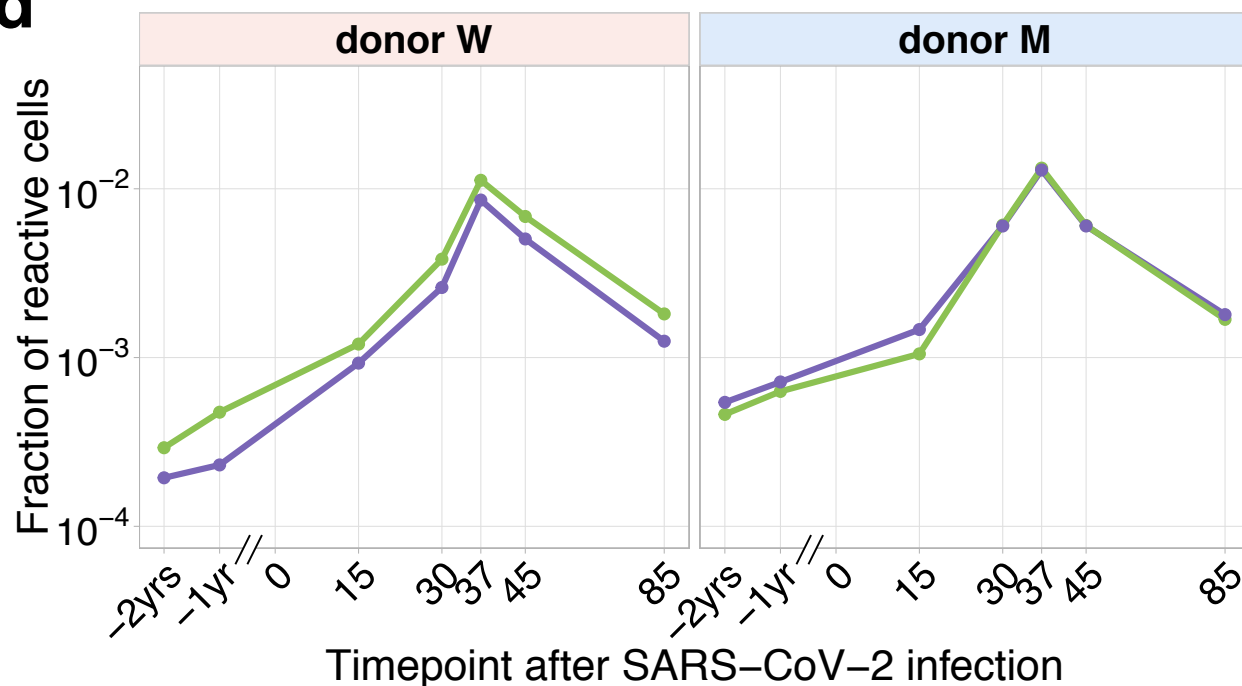**e**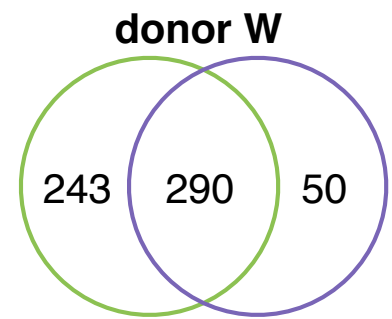**f**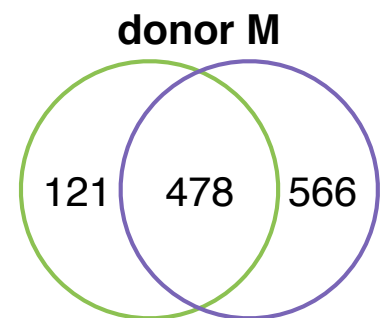

Supplement: supp [file elife-63502-supp-v1.zip]

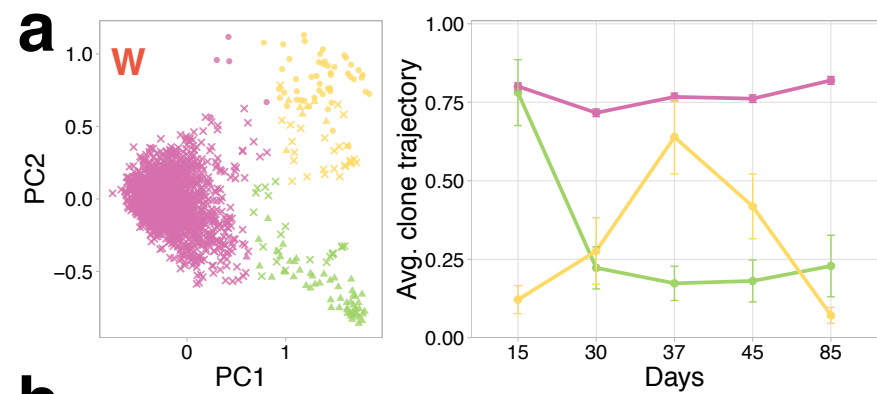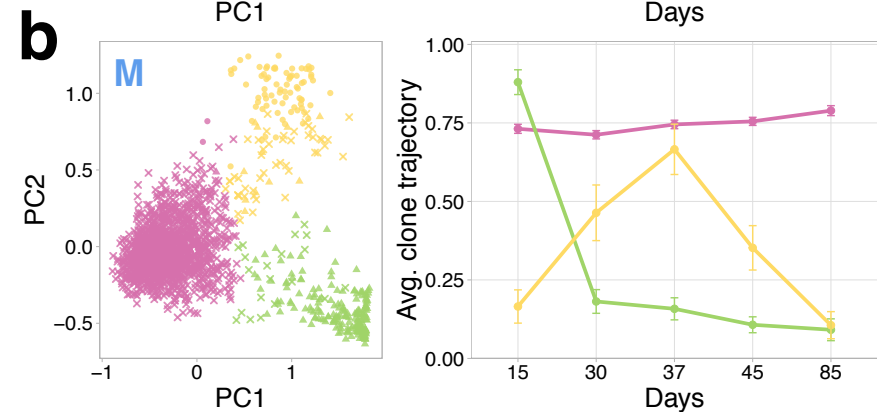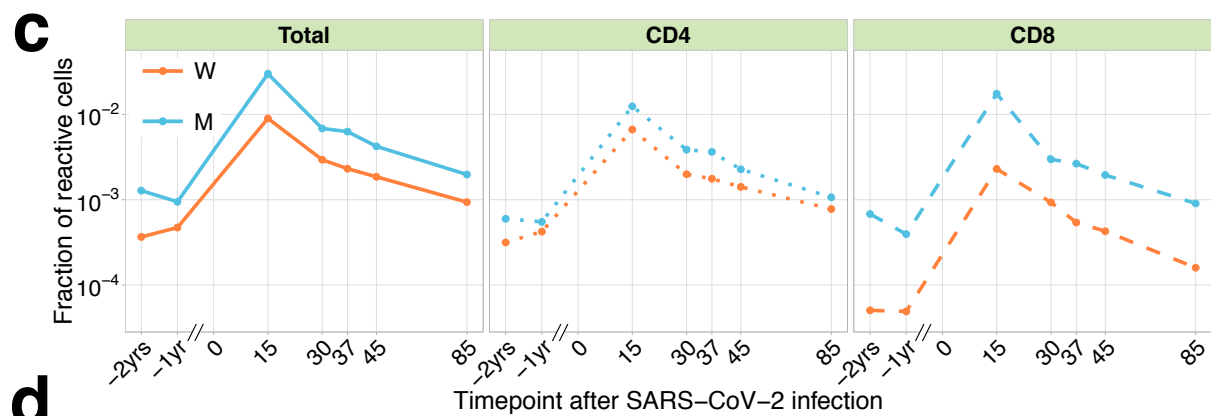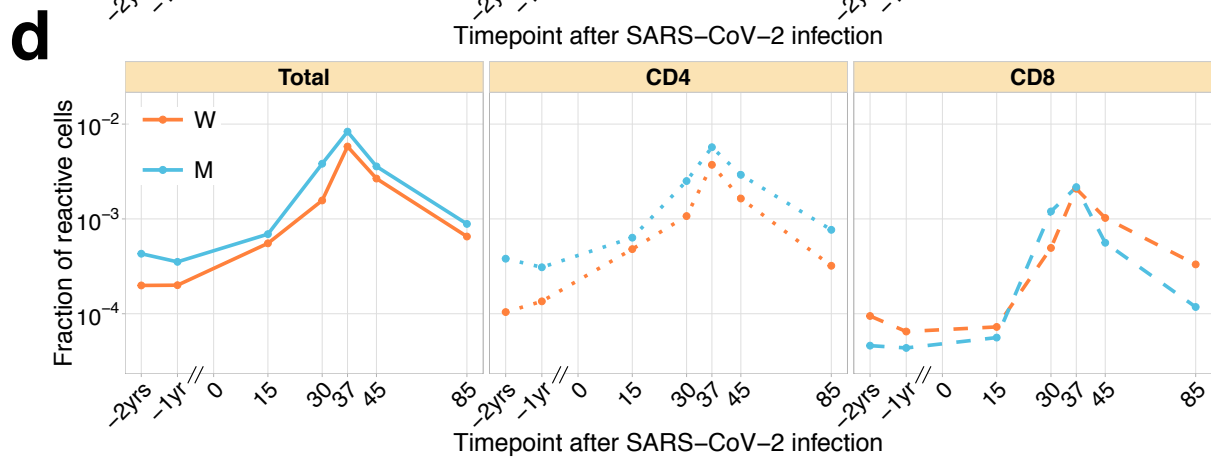

Supplement: supp [file elife-63502-supp-v1.zip]

**a**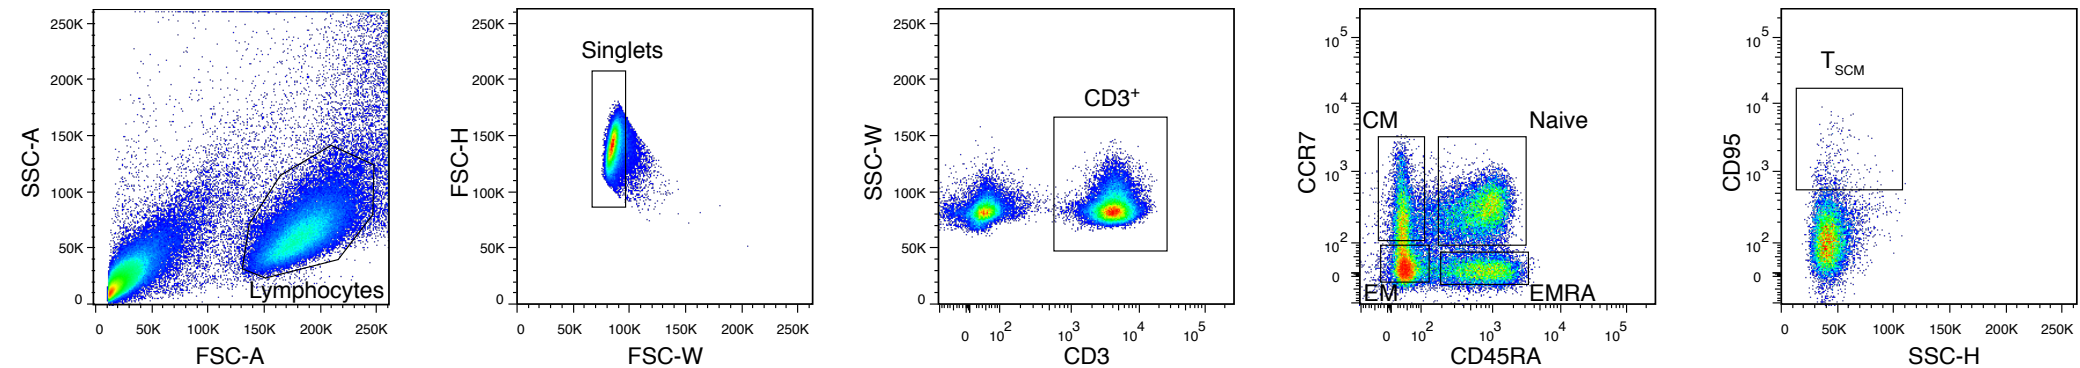**b**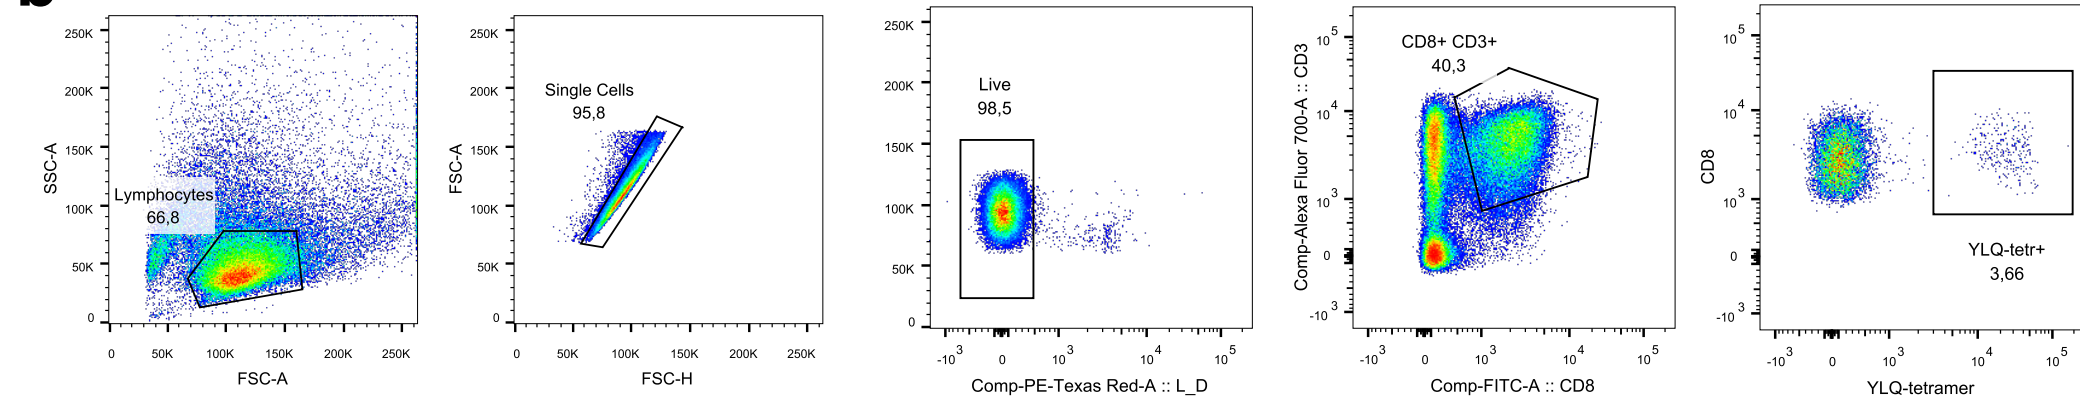

Supplement: supp [file elife-63502-supp-v1.zip]

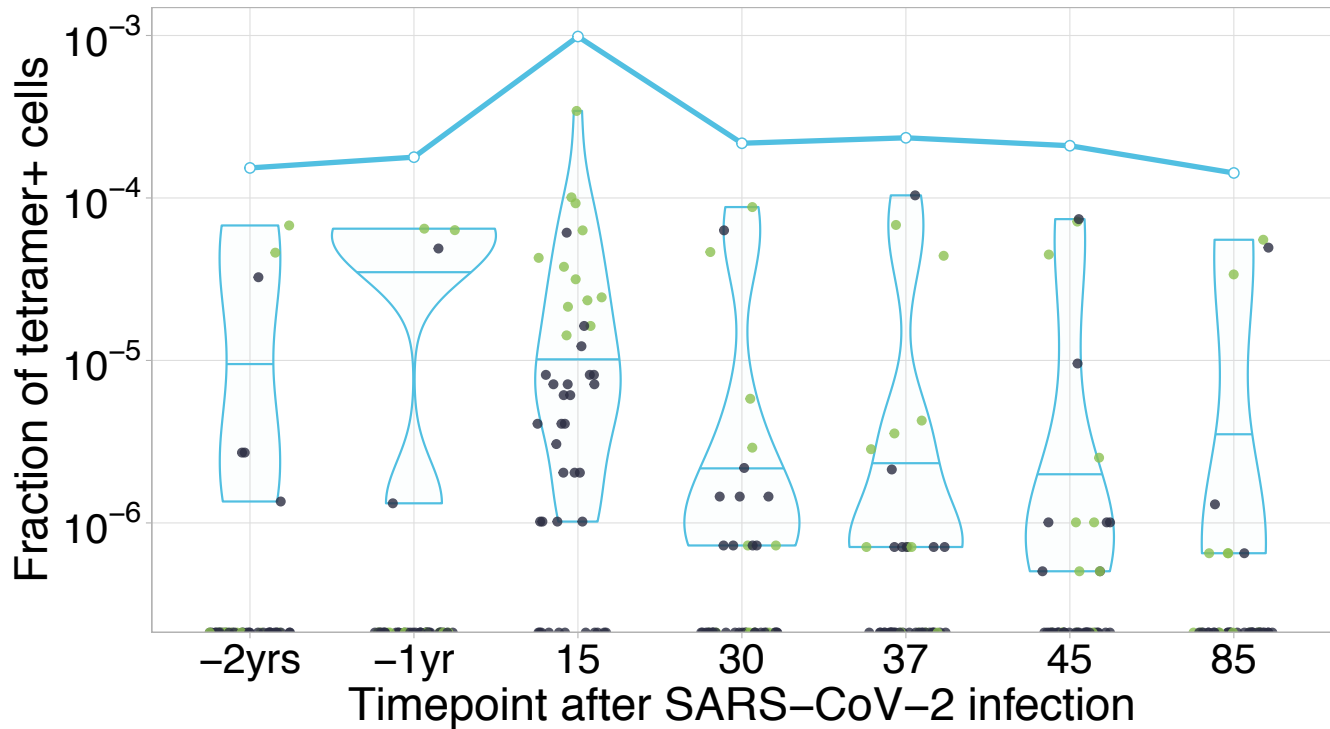

Supplement: supp [file elife-63502-supp-v1.zip]

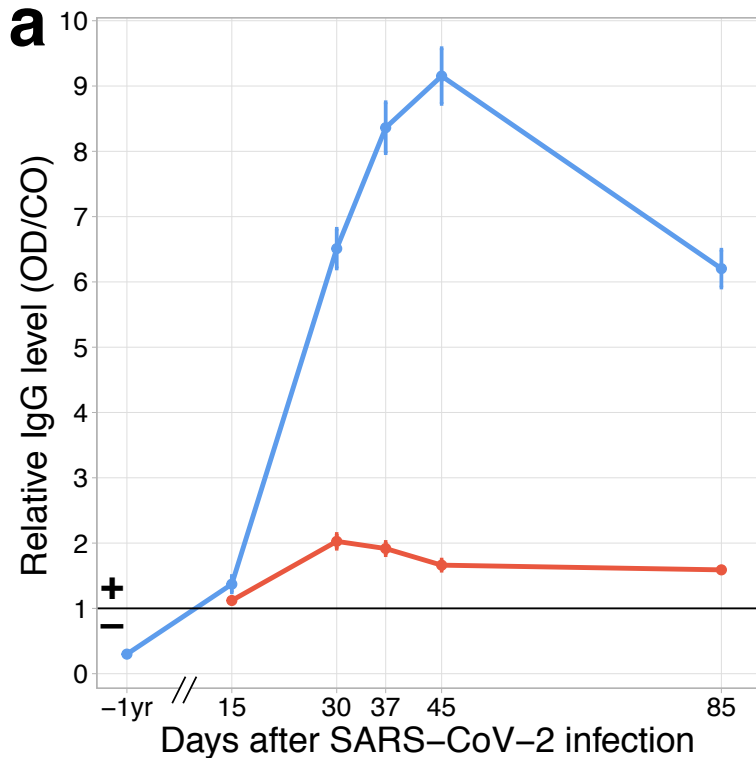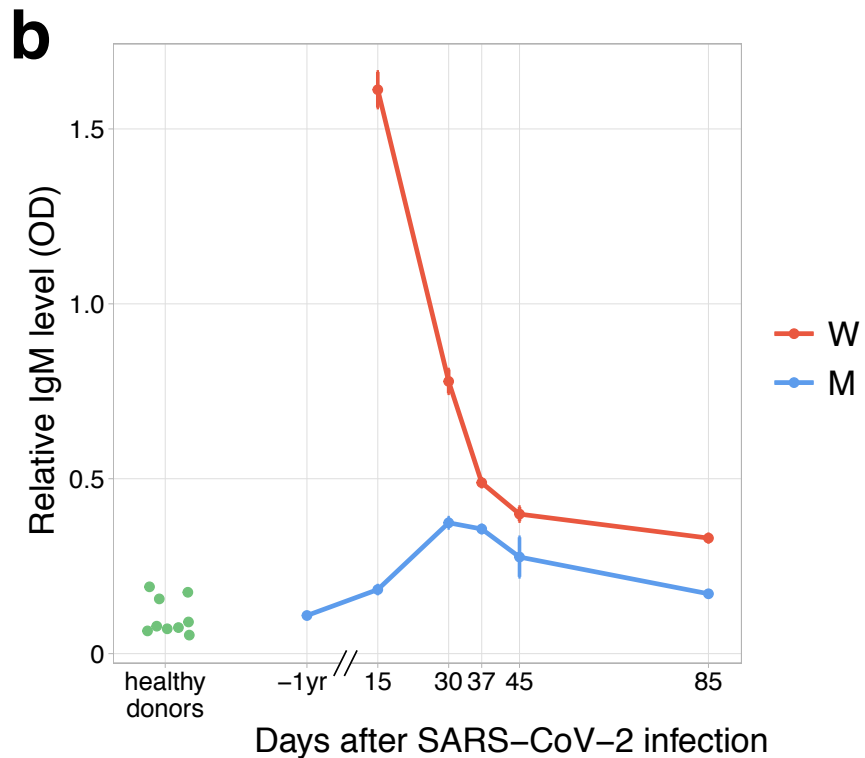

Supplement: supp [file elife-63502-supp-v1.zip]

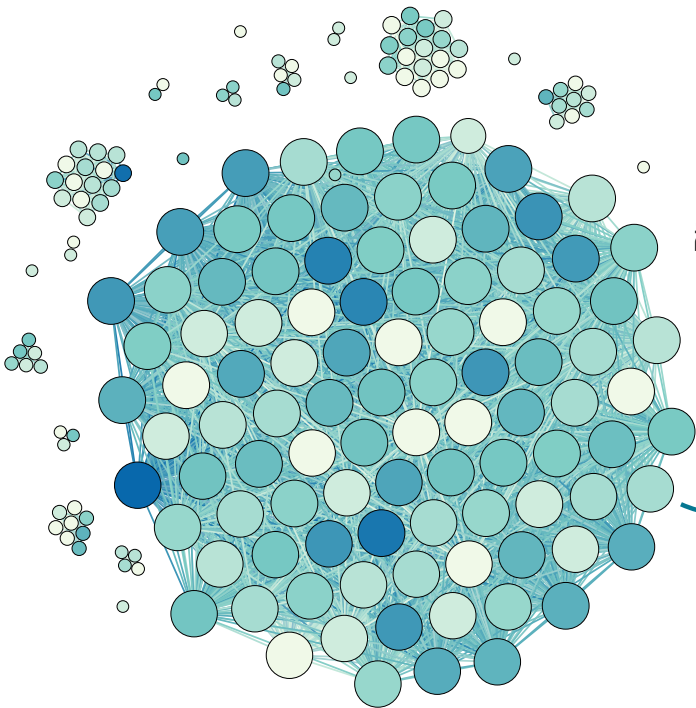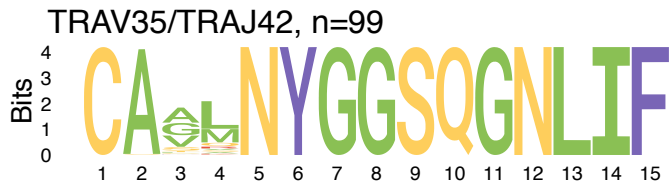

Supplement: supp [file elife-63502-supp-v1.zip]
